# Supplementary material
Source: publisher site journal article supplement (https://www.dovepress.com/article/supplementary_file/522207/522207%20Supplementary%20Material.xlsx)
Supplement: Supplementary file 1 [file 522207%20Supplementary%20Material.xlsx]

## Sheet: SNP
	Supplementary Table1 SNPs with genome-wide signifcance were namely used as instrumental variables
	traitId	phenotype	Year	Effect_Allele	Other_Allele	chr	pos	beta	se	pval	snp	fval
	ebi-a-GCST90013534	Rheumatoid arthritis	2020	A	G	1	154425456	-0.0751	0.0116	1.013e-10	rs12126142	137.561
	ebi-a-GCST90013534	Rheumatoid arthritis	2020	T	C	1	157669278	0.0744	0.0115	9.64495e-11	rs3761959	137.571
	ebi-a-GCST90013534	Rheumatoid arthritis	2020	T	C	1	173299743	-0.2018	0.0348	6.32805e-09	rs61828284	176.69
	ebi-a-GCST90013534	Rheumatoid arthritis	2020	A	G	1	2483961	-0.0921	0.0123	6.0437e-14	rs2258734	207.939
	ebi-a-GCST90013534	Rheumatoid arthritis	2020	T	C	1	38278579	0.0914	0.0136	1.66418e-11	rs28411352	144.272
	ebi-a-GCST90013534	Rheumatoid arthritis	2020	A	G	1	17672730	-0.1282	0.0121	0	rs2301888	457.027
	ebi-a-GCST90013534	Rheumatoid arthritis	2020	A	C	1	114303808	0.591	0.023	0	rs6679677	2246.5
	ebi-a-GCST90013534	Rheumatoid arthritis	2020	G	A	1	173166247	0.0797	0.0133	1.89701e-09	rs1234313	177.086
	ebi-a-GCST90013534	Rheumatoid arthritis	2020	G	A	1	17412501	-0.0885	0.0135	6.20297e-11	rs2076616	218.046
	ebi-a-GCST90013534	Rheumatoid arthritis	2020	T	C	1	186632317	-0.0847	0.0152	2.357e-08	rs10911902	91.3558
	ebi-a-GCST90013534	Rheumatoid arthritis	2020	A	T	2	74219615	-0.1234	0.0214	7.86303e-09	rs28421442	235.749
	ebi-a-GCST90013534	Rheumatoid arthritis	2020	T	C	2	61092858	0.1025	0.0152	1.58891e-11	rs12466919	175.982
	ebi-a-GCST90013534	Rheumatoid arthritis	2020	C	T	2	100760172	-0.0995	0.0114	2e-18	rs11123811	263.305
	ebi-a-GCST90013534	Rheumatoid arthritis	2020	T	C	2	191943742	0.1466	0.0129	0	rs11889341	420.353
	ebi-a-GCST90013534	Rheumatoid arthritis	2020	A	T	2	65598300	-0.1012	0.0131	1.1439e-14	rs1858037	289.642
	ebi-a-GCST90013534	Rheumatoid arthritis	2020	G	A	2	30445322	0.0818	0.0119	6.76862e-12	rs1355208	180.759
	ebi-a-GCST90013534	Rheumatoid arthritis	2020	A	G	2	204738919	-0.1261	0.0124	0	rs3087243	326.037
	ebi-a-GCST90013534	Rheumatoid arthritis	2020	G	A	3	27764623	0.0863	0.0131	3.93641e-11	rs3806624	156.302
	ebi-a-GCST90013534	Rheumatoid arthritis	2020	G	A	3	17053499	0.075	0.0117	1.75699e-10	rs4602367	138.75
	ebi-a-GCST90013534	Rheumatoid arthritis	2020	T	C	4	10726520	0.0989	0.0131	4.2904e-14	rs13103285	275.334
	ebi-a-GCST90013534	Rheumatoid arthritis	2020	A	G	4	26111593	0.1422	0.017	7.2e-17	rs34046593	314.123
	ebi-a-GCST90013534	Rheumatoid arthritis	2020	G	A	5	102603701	-0.0914	0.0146	3.95804e-10	rs403214	241.674
	ebi-a-GCST90013534	Rheumatoid arthritis	2020	C	T	5	10704797	0.0668	0.0122	4.62104e-08	rs2918392	110.688
	ebi-a-GCST90013534	Rheumatoid arthritis	2020	A	G	5	55444683	-0.1956	0.0184	0	rs7731626	626.76
	ebi-a-GCST90013534	Rheumatoid arthritis	2020	G	T	5	133423890	-0.089	0.0144	6.03601e-10	rs244685	154.439
	ebi-a-GCST90013534	Rheumatoid arthritis	2020	G	C	6	29506431	-0.2534	0.0222	0	rs3025669	1026.25
	ebi-a-GCST90013534	Rheumatoid arthritis	2020	C	T	6	29751129	0.1874	0.0194	0	rs9258357	570.902
	ebi-a-GCST90013534	Rheumatoid arthritis	2020	C	A	6	32019382	0.7878	0.0364	0	rs115521560	26136.4
	ebi-a-GCST90013534	Rheumatoid arthritis	2020	G	T	6	32586794	0.4888	0.0128	0	rs9271365	7644.37
	ebi-a-GCST90013534	Rheumatoid arthritis	2020	T	C	6	106676470	0.1037	0.0176	3.57396e-09	rs62422878	100.671
	ebi-a-GCST90013534	Rheumatoid arthritis	2020	T	C	6	14107197	0.1382	0.0204	1.35394e-11	rs12530098	239.959
	ebi-a-GCST90013534	Rheumatoid arthritis	2020	A	G	6	29748690	-0.1165	0.0131	0	rs1611236	265.492
	ebi-a-GCST90013534	Rheumatoid arthritis	2020	A	G	6	32179319	0.699	0.0402	0	rs71565312	831.062
	ebi-a-GCST90013534	Rheumatoid arthritis	2020	A	G	6	159489791	0.1058	0.0147	6.65733e-13	rs212389	321.509
	ebi-a-GCST90013534	Rheumatoid arthritis	2020	T	C	6	30775277	0.191	0.0188	0	rs112733823	266.294
	ebi-a-GCST90013534	Rheumatoid arthritis	2020	G	A	6	31449736	0.3833	0.0235	0	rs139395255	2688.77
	ebi-a-GCST90013534	Rheumatoid arthritis	2020	A	G	6	31868765	0.488	0.0441	0	rs114508013	410.315
	ebi-a-GCST90013534	Rheumatoid arthritis	2020	T	G	6	32450089	0.6519	0.0169	0	rs5020946	15115
	ebi-a-GCST90013534	Rheumatoid arthritis	2020	C	T	6	31976752	-0.6134	0.0876	2.474e-12	rs41316148	12851.3
	ebi-a-GCST90013534	Rheumatoid arthritis	2020	T	C	6	44233921	0.1964	0.0187	0	rs2233424	709.655
	ebi-a-GCST90013534	Rheumatoid arthritis	2020	A	G	6	138230389	0.2835	0.0253	0	rs7749323	414.911
	ebi-a-GCST90013534	Rheumatoid arthritis	2020	A	G	6	382537	-0.089	0.0137	9.25977e-11	rs9405192	222.345
	ebi-a-GCST90013534	Rheumatoid arthritis	2020	C	T	6	29931663	-0.1359	0.0193	1.88105e-12	rs11754264	431.611
	ebi-a-GCST90013534	Rheumatoid arthritis	2020	A	G	6	32268953	-0.4379	0.0452	0	rs146305655	312.383
	ebi-a-GCST90013534	Rheumatoid arthritis	2020	T	C	6	44284508	0.1597	0.0205	6.833e-15	rs76153210	488.028
	ebi-a-GCST90013534	Rheumatoid arthritis	2020	T	C	6	167540842	-0.1539	0.0116	0	rs1571878	667.445
	ebi-a-GCST90013534	Rheumatoid arthritis	2020	T	C	7	74126034	0.381	0.0424	0	rs117026326	1723.13
	ebi-a-GCST90013534	Rheumatoid arthritis	2020	G	A	7	92239144	0.0871	0.0153	1.28499e-08	rs42034	220.826
	ebi-a-GCST90013534	Rheumatoid arthritis	2020	A	G	7	28166442	-0.0782	0.0134	5.37205e-09	rs740122	174.08
	ebi-a-GCST90013534	Rheumatoid arthritis	2020	C	A	7	74016979	0.249	0.0349	9.52138e-13	rs4717901	1151.94
	ebi-a-GCST90013534	Rheumatoid arthritis	2020	C	T	7	128576086	0.1236	0.0137	0	rs3757387	442.425
	ebi-a-GCST90013534	Rheumatoid arthritis	2020	A	G	8	11348961	0.1127	0.0128	1e-18	rs9693589	357.682
	ebi-a-GCST90013534	Rheumatoid arthritis	2020	T	G	9	123668199	-0.0784	0.0121	9.72971e-11	rs10435844	179.645
	ebi-a-GCST90013534	Rheumatoid arthritis	2020	A	G	9	34710338	0.1153	0.0149	9.917e-15	rs11574914	199.665
	ebi-a-GCST90013534	Rheumatoid arthritis	2020	A	G	10	6100725	0.0991	0.0125	1.984e-15	rs3134883	188.182
	ebi-a-GCST90013534	Rheumatoid arthritis	2020	C	T	10	6517167	0.0829	0.0134	6.17007e-10	rs502919	197.541
	ebi-a-GCST90013534	Rheumatoid arthritis	2020	A	G	10	50025396	-0.0847	0.012	1.41612e-12	rs7097397	201.391
	ebi-a-GCST90013534	Rheumatoid arthritis	2020	T	C	10	63779871	0.1487	0.0143	0	rs71508903	364.061
	ebi-a-GCST90013534	Rheumatoid arthritis	2020	A	G	10	8095340	-0.0725	0.0122	2.51397e-09	rs2275806	151.061
	ebi-a-GCST90013534	Rheumatoid arthritis	2020	T	C	10	31411355	0.0671	0.0114	4.41601e-09	rs1538981	120.692
	ebi-a-GCST90013534	Rheumatoid arthritis	2020	C	G	10	64036881	0.1202	0.0181	3.01093e-11	rs6479800	408.968
	ebi-a-GCST90013534	Rheumatoid arthritis	2020	A	G	11	128494441	-0.0797	0.0128	4.63895e-10	rs7105899	158.211
	ebi-a-GCST90013534	Rheumatoid arthritis	2020	C	T	11	118743772	0.134	0.0178	5.5706e-14	rs6421571	194.522
	ebi-a-GCST90013534	Rheumatoid arthritis	2020	T	C	11	9752741	0.083	0.0131	2.70402e-10	rs9943599	184.334
	ebi-a-GCST90013534	Rheumatoid arthritis	2020	A	G	11	72411787	-0.0851	0.014	1.068e-09	rs34502849	157.559
	ebi-a-GCST90013534	Rheumatoid arthritis	2020	C	T	11	95311422	0.0982	0.017	7.84802e-09	rs4409785	277.402
	ebi-a-GCST90013534	Rheumatoid arthritis	2020	A	G	11	64042997	-0.1067	0.0175	1.11301e-09	rs660442	112.805
	ebi-a-GCST90013534	Rheumatoid arthritis	2020	A	G	12	24813281	0.0856	0.0156	3.75301e-08	rs4963581	214.21
	ebi-a-GCST90013534	Rheumatoid arthritis	2020	T	C	12	56469185	0.0878	0.0125	2.20699e-12	rs4622308	224.17
	ebi-a-GCST90013534	Rheumatoid arthritis	2020	C	T	13	40355913	0.114	0.0126	0	rs9532434	247.394
	ebi-a-GCST90013534	Rheumatoid arthritis	2020	T	A	14	69267695	0.0845	0.0126	2.28613e-11	rs1595260	140.762
	ebi-a-GCST90013534	Rheumatoid arthritis	2020	T	C	14	68760141	0.1069	0.0144	1.02212e-13	rs1950897	334.499
	ebi-a-GCST90013534	Rheumatoid arthritis	2020	C	A	14	105388182	0.1617	0.0179	0	rs2841275	723.578
	ebi-a-GCST90013534	Rheumatoid arthritis	2020	T	C	15	70010647	0.1366	0.0158	6e-18	rs7170107	232.921
	ebi-a-GCST90013534	Rheumatoid arthritis	2020	C	T	15	38834033	0.1244	0.0123	0	rs8032939	431.264
	ebi-a-GCST90013534	Rheumatoid arthritis	2020	T	C	16	30626616	0.0867	0.0157	3.04299e-08	rs12918327	87.1373
	ebi-a-GCST90013534	Rheumatoid arthritis	2020	T	G	16	11833886	0.0701	0.0119	4.142e-09	rs7206670	135.967
	ebi-a-GCST90013534	Rheumatoid arthritis	2020	G	C	16	86016401	0.0906	0.0136	2.30303e-11	rs9927316	195.086
	ebi-a-GCST90013534	Rheumatoid arthritis	2020	T	C	17	38067020	0.0743	0.012	5.85504e-10	rs4795400	119.339
	ebi-a-GCST90013534	Rheumatoid arthritis	2020	G	A	18	12797694	0.0903	0.0119	2.6497e-14	rs2847297	238.219
	ebi-a-GCST90013534	Rheumatoid arthritis	2020	C	G	19	10463118	-0.3801	0.0474	1.079e-15	rs34536443	4528.78
	ebi-a-GCST90013534	Rheumatoid arthritis	2020	T	C	20	62484008	-0.1074	0.0171	3.19396e-10	rs6011186	300.717
	ebi-a-GCST90013534	Rheumatoid arthritis	2020	C	T	20	44746982	0.1052	0.0127	1.13e-16	rs1883832	243.988
	ebi-a-GCST90013534	Rheumatoid arthritis	2020	C	G	21	45653764	-0.0894	0.0143	4.27504e-10	rs7278257	232.167
	ebi-a-GCST90013534	Rheumatoid arthritis	2020	C	A	21	43855067	-0.0976	0.0132	1.48115e-13	rs1893592	277.222
	ebi-a-GCST90013534	Rheumatoid arthritis	2020	C	T	21	45707976	0.1029	0.0182	1.46501e-08	rs2073609	285.725
	ebi-a-GCST90013534	Rheumatoid arthritis	2020	C	T	21	34775444	-0.0823	0.0137	1.81401e-09	rs8126756	196.362
	ebi-a-GCST90013534	Rheumatoid arthritis	2020	A	G	22	39747780	0.1296	0.014	0	rs2069235	463.543
	ebi-a-GCST90013534	Rheumatoid arthritis	2020	A	G	22	21916361	0.0891	0.0139	1.355e-10	rs5754104	165.198
	ebi-a-GCST90013534	Rheumatoid arthritis	2020	G	T	X	78466147	-0.0787	0.0134	4.79104e-09	rs5912815	175.766
	ieu-b-5116	Psoriatic arthritis	2022	C	T	1	25270572	0.15853	0.027752	6.48037e-11	rs1395621	335.145
	ieu-b-5116	Psoriatic arthritis	2022	T	G	1	67600686	0.236894	0.031826	0	rs12044149	590.733
	ieu-b-5116	Psoriatic arthritis	2022	G	A	2	163110536	0.221356	0.028958	0	rs2111485	624.543
	ieu-b-5116	Psoriatic arthritis	2022	A	G	5	158766022	-0.311035	0.018054	0	rs62377586	1156.04
	ieu-b-5116	Psoriatic arthritis	2022	G	A	5	158841318	-0.165469	0.021618	2.63998e-10	rs10476295	346.106
	ieu-b-5116	Psoriatic arthritis	2022	C	A	5	131996500	0.247904	0.038342	9.49e-16	rs848	472.609
	ieu-b-5116	Psoriatic arthritis	2022	C	T	6	31224667	0.431965	0.088386	1.33999e-12	rs9264277	2472.02
	ieu-b-5116	Psoriatic arthritis	2022	T	G	6	138199417	-0.141033	0.020699	7.75997e-09	rs610604	233.491
	ieu-b-5116	Psoriatic arthritis	2022	C	T	6	29916804	0.338919	0.035985	0	rs1655901	1548.86
	ieu-b-5116	Psoriatic arthritis	2022	T	C	6	31244082	0.845072	0.072244	0	rs13203895	5456.01
	ieu-b-5116	Psoriatic arthritis	2022	T	C	6	111913262	0.508737	0.064293	0	rs33980500	1032.37
	ieu-b-5116	Psoriatic arthritis	2022	C	T	6	31170014	-0.217931	0.019662	4e-18	rs9263869	556.549
	ieu-b-5116	Psoriatic arthritis	2022	T	C	6	32710221	0.177753	0.029766	3.59005e-12	rs9461806	412.75
	ieu-b-5116	Psoriatic arthritis	2022	C	T	12	56743367	-0.358873	0.032249	1.26009e-13	rs2020854	425.874
	ieu-b-5116	Psoriatic arthritis	2022	G	A	17	26126345	0.174526	0.028521	1.18005e-12	rs6505483	372.588
	ieu-b-5116	Psoriatic arthritis	2022	A	G	19	10416444	-0.232851	0.031916	2.94002e-08	rs73510898	234.696
	ieu-b-5116	Psoriatic arthritis	2022	C	G	19	10463118	-0.536157	0.037954	1.1601e-14	rs34536443	620.849
	ieu-b-5116	Psoriatic arthritis	2022	G	A	22	21985094	0.177816	0.034184	1.61002e-09	rs5754467	264.481
	finn-b-RHEUMA_SERONEG	Seronegative rheumatoid arthritis	2021	A	C	1	114303808	0.3121	0.0473	4.32116e-11	rs6679677	4350.83
	finn-b-RHEUMA_SERONEG	Seronegative rheumatoid arthritis	2021	C	A	6	31401957	0.7472	0.0635	0	rs2263324	18317.9
	finn-b-RHEUMA_SERONEG	Seronegative rheumatoid arthritis	2021	A	G	6	32634152	0.3863	0.0406	0	rs9274507	10711.6
	finn-b-RHEUMA_SERONEG	Seronegative rheumatoid arthritis	2021	C	G	6	31365089	0.873	0.0682	0	rs145575084	20530.5
	finn-b-RHEUMA_SERONEG	Seronegative rheumatoid arthritis	2021	T	G	6	32124424	0.5658	0.082	5.2626e-12	rs10947233	5170.72
	finn-b-RHEUMA_SERONEG	Seronegative rheumatoid arthritis	2021	C	A	6	31933977	0.3251	0.0566	9.39399e-09	rs9296004	3283.28
	finn-b-M13_SPONDYLOPATHY	Spondyloarthritis	2021	G	A	2	69523838	0.0745	0.0124	2.20501e-09	rs11126231	496.878
	finn-b-M13_SPONDYLOPATHY	Spondyloarthritis	2021	G	A	6	28382494	0.1026	0.0158	7.62606e-11	rs7451726	570.914
	finn-b-M13_SPONDYLOPATHY	Spondyloarthritis	2021	C	G	6	31365089	0.4904	0.0232	0	rs145575084	6636.88
	finn-b-M13_SPONDYLOPATHY	Spondyloarthritis	2021	C	A	6	31401957	0.3765	0.022	0	rs2263324	4682.64
	finn-b-M13_SPONDYLOPATHY	Spondyloarthritis	2021	G	A	6	31129642	0.3178	0.0264	0	rs2073722	2037.02
	finn-b-M13_SPONDYLOPATHY	Spondyloarthritis	2021	A	G	18	50782037	0.0708	0.0122	6.88002e-09	rs12969597	458.543
	finn-b-JUVEN_ARTHR	Juvenile Idiopathic Arthritis	2021	G	A	6	31388386	1.0744	0.1062	0	rs115681000	34312.3
	finn-b-JUVEN_ARTHR	Juvenile Idiopathic Arthritis	2021	G	A	6	31129642	0.9956	0.1232	6.51e-16	rs2073722	20264.4
	finn-b-JUVEN_ARTHR	Juvenile Idiopathic Arthritis	2021	G	A	6	31377642	0.562	0.0785	8.33681e-13	rs9266804	13827.1
	finn-b-JUVEN_ARTHR	Juvenile Idiopathic Arthritis	2021	C	T	6	31224667	0.334	0.0594	1.90801e-08	rs9264277	8026.96
	finn-b-JUVEN_ARTHR	Juvenile Idiopathic Arthritis	2021	T	C	6	32637492	0.8951	0.0949	0	rs116080026	28450.6
	finn-b-M13_ENTEROARTHR	Enteropathic arthropathies	2021	G	A	6	31129642	1.4254	0.2064	4.93856e-12	rs2073722	40712
	finn-b-M13_ENTEROARTHR	Enteropathic arthropathies	2021	A	G	6	31362941	1.6882	0.1837	0	rs142973694	97725.6
	finn-b-M13_ENTEROARTHR	Enteropathic arthropathies	2021	C	A	6	31401957	1.3286	0.1676	2.234e-15	rs2263324	63617.9
	finn-b-M13_ENTEROARTHR	Enteropathic arthropathies	2021	T	C	7	149844670	0.484	0.0883	4.27396e-08	rs2888631	19408
	finn-b-SPONDYLOARTHRITIS	Spinal Arthritis	2021	T	G	6	30232538	0.5553	0.0484	0	rs28780091	11087.6
	finn-b-SPONDYLOARTHRITIS	Spinal Arthritis	2021	C	A	6	31308268	2.4658	0.0745	0	rs34166683	531875
	finn-b-SPONDYLOARTHRITIS	Spinal Arthritis	2021	A	G	6	28480023	0.6915	0.0454	0	rs34668037	20932.4
	finn-b-SPONDYLOARTHRITIS	Spinal Arthritis	2021	C	T	6	31224667	0.2897	0.0313	0	rs9264277	6903.81
	finn-b-SPONDYLOARTHRITIS	Spinal Arthritis	2021	T	C	6	31290813	1.9131	0.0512	0	rs76269511	402659
	finn-b-SPONDYLOARTHRITIS	Spinal Arthritis	2021	T	A	6	31308268	-0.4479	0.0317	0	rs34166683	20274.7
	finn-b-SPONDYLOARTHRITIS	Spinal Arthritis	2021	T	C	6	32611255	0.213	0.0324	4.783e-11	rs1065045	3690.75
	finn-b-SPONDYLOARTHRITIS	Spinal Arthritis	2021	A	G	6	32790940	0.8559	0.0596	0	rs2621320	18766.3
	finn-b-SPONDYLOARTHRITIS	Spinal Arthritis	2021	G	C	6	33864288	0.4662	0.0469	0	rs12190850	8245.12
	finn-b-SPONDYLOARTHRITIS	Spinal Arthritis	2021	T	C	6	30775277	0.2241	0.0329	1.0311e-11	rs112733823	3499.9
	finn-b-SPONDYLOARTHRITIS	Spinal Arthritis	2021	C	T	7	5340664	-0.3449	0.057	1.48501e-09	rs10807943	2858.4
	finn-b-SPONDYLOARTHRITIS	Spinal Arthritis	2021	C	G	7	5473610	0.563	0.0684	1.84e-16	rs181316459	5862.84
	finn-b-M13_REACTARTH	Reactive Arthritis	2021	A	G	6	27769705	0.2609	0.0402	8.52904e-11	rs200477	4656.43
	finn-b-M13_REACTARTH	Reactive Arthritis	2021	T	C	6	32634588	0.3783	0.0645	4.59505e-09	rs113140854	3819.53
	finn-b-M13_REACTARTH	Reactive Arthritis	2021	G	C	6	28209197	0.6214	0.0596	0	rs7769054	13743.7
	finn-b-M13_REACTARTH	Reactive Arthritis	2021	C	A	6	31401957	1.6585	0.0762	0	rs2263324	134443
	finn-b-M13_REACTARTH	Reactive Arthritis	2021	C	T	6	31224667	0.2937	0.0432	1.01391e-11	rs9264277	5261.02
	finn-b-M13_REACTARTH	Reactive Arthritis	2021	C	G	6	31365089	2.1379	0.0835	0	rs145575084	270748
	finn-b-M13_SACROILIITIS	Sacroiliitis	2021	C	T	6	28177854	0.6834	0.0933	2.41213e-13	rs73740584	19207.9
	finn-b-M13_SACROILIITIS	Sacroiliitis	2021	C	A	6	31401957	2.0663	0.1271	0	rs2263324	462299
	finn-b-M13_SACROILIITIS	Sacroiliitis	2021	G	A	6	31129642	1.7227	0.1515	0	rs2073722	76496.9
	finn-b-M13_SACROILIITIS	Sacroiliitis	2021	G	A	6	31388386	2.5763	0.1368	0	rs115681000	6.21933e+06
	finn-b-M13_FIBROMYALGIA	Fibromyalgia	2021	G	A	17	75746808	-0.3265	0.0579	1.69001e-08	rs4486972	8171.58
	finn-b-M13_FIBROMYALGIA	Fibromyalgia	2021	G	A	17	75746808	-0.3265	0.0579	1.69001e-08	rs4486972	8171.58
